# Supplementary material for: Cytokine gene polymorphism associations with congenital cytomegalovirus infection and sensorineural hearing loss
Source: Springer Nature journal article supplement (doi:10.1007/s10096-017-2996-6), 2017-05-13
Supplement: MOESM1 [file 12286172]

## **Cytokine gene polymorphisms associations with congenital cytomegalovirus infection and sensorineural hearing loss**

*European Journal of Clinical Microbiology & Infectious Diseases*

Beata Kasztelewicz,<sup>1</sup> PhD; Justyna Czech-Kowalska,<sup>2</sup> PhD; Bożena Lipka,<sup>3</sup> PhD; Bogumiła Milewska-Bobula,<sup>3</sup> Prof.; Maria K. Borszewska-Kornacka,<sup>4</sup> Prof.; Justyna Romańska,<sup>4</sup> PhD; Katarzyna Dzierżanowska-Fangrat,<sup>1</sup> PhD

<sup>1</sup> Department of Clinical Microbiology and Immunology, The Children's Memorial Health Institute, Warsaw, Poland.

<sup>2</sup> Department of Neonatology and Neonatal Intensive Care, The Children's Memorial Health Institute, Warsaw, Poland.

<sup>3</sup> Department of Infant Diseases, The Children's Memorial Health Institute, Warsaw, Poland.

<sup>4</sup> Department of Neonatology, Warsaw Medical University Hospital, Warsaw, Poland.

**Corresponding author:** Beata Kasztelewicz, e-mail address: [b.kasztelewicz@czd.pl](mailto:b.kasztelewicz@czd.pl)

**Table S1** Association analysis of individual SNPs with congenital CMV infection

| Gene<br>(SNP database ID<br>number)   | Genetic<br>model | Genotype  | Genotype frequencies; n (%)   |                                  | OR (95% CI)        | P-value <sup>a</sup> | AIC   |
|---------------------------------------|------------------|-----------|-------------------------------|----------------------------------|--------------------|----------------------|-------|
|                                       |                  |           | Congenital<br>CMV<br>(n = 72) | Healthy<br>controls<br>(n = 398) |                    |                      |       |
| <b>IL1B rs16944</b><br>(-511 T/C)     | Co-D             | CC        | 31 (43.1)                     | 183 (46.0)                       | 1                  | <b>0.046</b>         | 402.4 |
|                                       |                  | CT        | 28 (38.9)                     | 183 (46.0)                       | 0.90 (0.52 - 1.57) |                      |       |
|                                       |                  | TT        | 13 (18.1)                     | 32 (8.0)                         | 2.40 (1.13 - 5.07) |                      |       |
|                                       | D                | CC        | 31 (43.1)                     | 183 (46.0)                       | 1                  | 0.65                 | 406.3 |
|                                       |                  | CT/TT     | 41 (56.9)                     | 215 (54.0)                       | 1.13 (0.68 - 1.87) |                      |       |
|                                       | R                | CC/CT     | 59 (81.9)                     | 366 (92.0)                       | 1                  | <b>0.014</b>         | 400.5 |
|                                       |                  | TT        | 13 (18.1)                     | 32 (8.0)                         | 2.25 (1.25 - 5.08) |                      |       |
|                                       | O-D              | CC/TT     | 44 (61.1)                     | 215 (54.0)                       | 1                  | 0.26                 | 405.3 |
| CT                                    |                  | 28 (38.9) | 183 (46.0)                    | 0.75 (0.45 - 1.25)               |                    |                      |       |
| <b>IL1B rs1143634</b><br>(+3954 T/C)  | Co-D             | CC        | 43 (59.7)                     | 277 (57.0)                       | 1                  | 0.91                 | 408.3 |
|                                       |                  | CT        | 24 (33.3)                     | 141 (35.4)                       | 0.90 (0.52 - 1.54) |                      |       |
|                                       |                  | TT        | 5 (6.9)                       | 30 (7.5)                         | 0.88 (0.32 - 2.39) |                      |       |
|                                       | D                | CC        | 43 (59.7)                     | 227 (57.0)                       | 1                  | 0.67                 | 406.3 |
|                                       |                  | CT/TT     | 29 (40.3)                     | 171 (43.0)                       | 0.90 (0.54 - 1.49) |                      |       |
|                                       | R                | CC/CT     | 67 (93.1)                     | 368 (92.5)                       | 1                  | 0.86                 | 406.5 |
|                                       |                  | TT        | 5 (6.9)                       | 30 (7.5)                         | 0.92 (0.34 - 2.44) |                      |       |
|                                       | O-D              | CC/TT     | 48 (66.7)                     | 257 (64.6)                       | 1                  | 0.73                 | 406.4 |
| CT                                    |                  | 24 (33.3) | 141 (35.4)                    | 0.91 (0.54 - 1.55)               |                    |                      |       |
| <b>IL12B rs3212227</b><br>(3'UTR C/A) | Co-D             | AA        | 49 (68.1)                     | 255 (64.1)                       | 1                  | 0.53                 | 407.2 |
|                                       |                  | AC        | 22 (30.6)                     | 129 (32.4)                       | 0.89 (0.51 - 1.53) |                      |       |
|                                       |                  | CC        | 1 (1.4)                       | 14 (3.5)                         | 0.37 (0.05 - 2.89) |                      |       |
|                                       | D                | AA        | 49 (68.1)                     | 255 (64.1)                       | 1                  | 0.51                 | 406.1 |
|                                       |                  | AC/CC     | 23 (31.9)                     | 143 (35.9)                       | 0.84 (0.49 - 1.43) |                      |       |
|                                       | R                | AA/AC     | 71 (98.6)                     | 384 (96.5)                       | 1                  | 0.3                  | 405.4 |
|                                       |                  | CC        | 1 (1.4)                       | 14 (3.5)                         | 0.39 (0.05 - 2.98) |                      |       |
|                                       | O-D              | AA/CC     | 50 (69.4)                     | 269 (67.6)                       | 1                  | 0.76                 | 406.4 |

|                                                   |       |              |            |                    |                    |               |       |
|---------------------------------------------------|-------|--------------|------------|--------------------|--------------------|---------------|-------|
|                                                   |       | AC           | 22 (30.6)  | 129 (32.4)         | 0.92 (0.53 - 1.58) |               |       |
| <b>CCL2 rs13900</b> <sup>b</sup><br>(+1543 T/C)   | Co-D  | CC           | 35 (48.6)  | 208 (52.4)         | 1                  | 0.83          | 407.8 |
|                                                   |       | CT           | 30 (41.7)  | 151 (38.0)         | 1.18 (0.69 - 2.01) |               |       |
|                                                   |       | TT           | 7 (9.7)    | 38 (9.6)           | 1.09 (0.45 - 2.64) |               |       |
|                                                   | D     | CC           | 35 (48.6)  | 208 (52.4)         | 1                  | 0.55          | 405.8 |
|                                                   |       | CT/TT        | 37 (51.4)  | 189 (47.6)         | 1.16 (0.70 - 1.92) |               |       |
|                                                   | R     | CC/CT        | 65 (90.3)  | 359 (90.4)         | 1                  | 0.97          | 406.2 |
| TT                                                |       | 7 (9.7)      | 38 (9.6)   | 1.02 (0.44 - 2.38) |                    |               |       |
| O-D                                               | CC/TT | 42 (58.3)    | 246 (62.0) | 1                  | 0.56               | 405.8         |       |
|                                                   | CT    | 30 (41.7)    | 151 (38.0) | 1.16 (0.70 - 1.94) |                    |               |       |
| <b>CCL2 rs1024611</b> <sup>c</sup><br>(-2518 G/A) | Co-D  | AA           | 36 (50)    | 219 (55.4)         | 1                  | 0.7           | 406.8 |
|                                                   |       | AG           | 29 (40.3)  | 142 (36.0)         | 1.24 (0.73 - 2.12) |               |       |
|                                                   |       | GG           | 7 (9.7)    | 34 (8.6)           | 1.25 (0.52 - 3.04) |               |       |
|                                                   | D     | AA           | 36 (50)    | 219 (55.4)         | 1                  | 0.39          | 404.8 |
|                                                   |       | AG/GG        | 36 (50)    | 176 (44.6)         | 1.24 (0.75 - 2.06) |               |       |
|                                                   | R     | AA/AG        | 65 (90.3)  | 361 (91.4)         | 1                  | 0.76          | 405.4 |
|                                                   |       | GG           | 7 (9.7)    | 34 (8.6)           | 1.14 (0.49 - 2.69) |               |       |
|                                                   | O-D   | AA/GG        | 43 (59.7)  | 253 (64.0)         | 1                  | 0.49          | 405.0 |
| AG                                                |       | 29 (40.3)    | 142 (36.0) | 1.20 (0.72 - 2.01) |                    |               |       |
| <b>CCR5 rs333</b><br>(CCR5Δ32)                    | Co-D  | wt wt        | 58 (80.6)  | 334 (83.9)         | 1                  | 0.64          | 407.6 |
|                                                   |       | wtΔ32        | 14 (19.4)  | 63 (15.8)          | 1.28 (0.67 - 2.43) |               |       |
|                                                   |       | Δ32Δ32       | 0 (0)      | 1 (0.2)            | 0.00 (0.00 - NA)   |               |       |
|                                                   | D     | wtw          | 58 (80.6)  | 334 (83.9)         | 1                  | 0.49          | 406.0 |
|                                                   |       | wtΔ32/Δ32Δ32 | 14 (19.4)  | 64 (16.1)          | 1.26 (0.66 - 2.39) |               |       |
|                                                   | R     | wtw/wtΔ32    | 72 (100)   | 397 (99.8)         | 1                  | 0.56          | 406.2 |
|                                                   |       | Δ32Δ32       | 0 (0)      | 1 (0.2)            | 0.00 (0.00 - NA)   |               |       |
|                                                   | O-D   | wtw/Δ32Δ32   | 58 (80.6)  | 335 (84.2)         | 1                  | 0.45          | 406.0 |
| wtΔ32                                             |       | 14 (19.4)    | 63 (15.8)  | 1.28 (0.67 - 2.44) |                    |               |       |
| <b>TNF rs179964</b><br>(-1031 C/T)                | Co-D  | TT           | 42 (58.3)  | 283 (71.1)         | 1                  | <b>0.0092</b> | 399.1 |
|                                                   |       | TC           | 29 (40.3)  | 95 (23.9)          | 2.06 (1.21 - 3.48) |               |       |

|                                                   |      |       |           |            |                    |              |       |
|---------------------------------------------------|------|-------|-----------|------------|--------------------|--------------|-------|
|                                                   |      | CC    | 1 (1.4)   | 20 (5.0)   | 0.34 (0.04 - 2.58) |              |       |
|                                                   | D    | TT    | 42 (58.3) | 283 (71.1) | 1                  | <b>0.034</b> | 402.0 |
|                                                   |      | TC/CC | 30 (41.7) | 115 (28.9) | 1.76 (1.05 - 2.95) |              |       |
|                                                   | R    | TT/TC | 71 (98.6) | 378 (95.0) | 1                  | 0.12         | 404.1 |
|                                                   |      | CC    | 1 (1.4)   | 20 (5.0)   | 0.27 (0.04 - 2.02) |              |       |
|                                                   | O-D  | TT/CC | 43 (59.7) | 303 (76.1) | 1                  | <b>0.005</b> | 398.6 |
|                                                   |      | TC    | 29 (40.3) | 95 (23.9)  | 2.15 (1.27 - 3.63) |              |       |
| <b>TNF rs1800629</b><br>(-308 A/G)                | Co-D | GG    | 52 (72.2) | 283(71.1)  | 1                  | 0.43         | 406.8 |
|                                                   |      | GA    | 17 (23.6) | 108 (27.1) | 0.86 (0.47 - 1.55) |              |       |
|                                                   |      | AA    | 3 (4.2)   | 7 (1.8)    | 2.33 (0.58 - 9.31) |              |       |
|                                                   | D    | GG    | 52 (72.2) | 283 (71.1) | 1                  | 0.85         | 406.5 |
|                                                   |      | GA/AA | 20 (27.8) | 115 (28.9) | 0.95 (0.54 - 1.66) |              |       |
|                                                   | R    | GG/GA | 69 (95.8) | 391 (98.2) | 1                  | 0.24         | 405.1 |
|                                                   |      | AA    | 3 (4.2)   | 7 (1.8)    | 2.43 (0.61 - 9.62) |              |       |
|                                                   | O-D  | GG/AA | 55 (76.4) | 290 (72.9) | 1                  | 0.53         | 406.1 |
|                                                   |      | GA    | 17 (23.6) | 108 (27.1) | 0.83 (0.46 - 1.49) |              |       |
| <b>TNFRSF1A</b><br><b>rs4149570</b><br>(-201 A/C) | Co-D | CC    | 29 (40.3) | 173 (43.5) | 1                  | 0.55         | 407.3 |
|                                                   |      | CA    | 35 (48.6) | 168 (42.2) | 1.24 (0.73 - 2.12) |              |       |
|                                                   |      | AA    | 8 (11.1)  | 57 (14.3)  | 0.84 (0.36 - 1.94) |              |       |
|                                                   | D    | CC    | 29 (40.3) | 173 (43.5) | 1                  | 0.61         | 406.3 |
|                                                   |      | CA/CC | 43 (59.7) | 225 (56.5) | 1.14 (0.68 - 1.90) |              |       |
|                                                   | R    | CC/CA | 64 (88.9) | 341 (85.7) | 1                  | 0.46         | 406.0 |
|                                                   |      | AA    | 8 (11.1)  | 57 (14.3)  | 0.75 (0.34 - 1.64) |              |       |
|                                                   | O-D  | CC/AA | 37 (51.4) | 230 (57.8) | 1                  | 0.31         | 405.5 |
|                                                   |      | CA    | 35 (48.6) | 168 (42.2) | 1.30 (0.78 - 2.14) |              |       |
| <b>IL10 rs1800896</b><br>(-1082 G/A)              | Co-D | TT    | 23 (31.9) | 127 (31.9) | 1                  | 0.11         | 404.2 |
|                                                   |      | CT    | 42 (58.3) | 196 (49.2) | 1.18 (0.68 - 2.06) |              |       |
|                                                   |      | CC    | 7 (9.7)   | 75 (18.8)  | 0.52 (0.21 - 1.26) |              |       |
|                                                   | D    | TT    | 23 (31.9) | 127 (31.9) | 1                  | 1            | 406.5 |
|                                                   |      | CT/CC | 49 (68.1) | 271 (68.1) | 1.00 (0.58 - 1.71) |              |       |

|                                        |      |       |           |            |                       |       |       |
|----------------------------------------|------|-------|-----------|------------|-----------------------|-------|-------|
|                                        | R    | TT/CT | 65 (90.3) | 323 (81.2) | 1                     | 0.046 | 402.5 |
|                                        |      | CC    | 7 (9.7)   | 75 (18.8)  | 0.46 (0.20 - 1.05)    |       |       |
|                                        | O-D  | TT/CC | 30 (41.7) | 202 (50.8) | 1                     | 0.15  | 404.5 |
|                                        |      | CT    | 42 (58.3) | 196 (49.2) | 1.44 (0.87 - 2.40)    |       |       |
| <b>IL10RA rs4252279</b><br>(+5964 T/C) | Co-D | CC    | 54 (75)   | 307 (77.1) | 1                     | 0.13  | 404.5 |
|                                        |      | CT    | 16 (22.2) | 90 (22.6)  | 1.01 (0.55 - 1.85)    |       |       |
|                                        |      | TT    | 2 (2.8)   | 1 (0.2)    | 11.37 (1.01 - 127.60) |       |       |
|                                        | D    | CC    | 54 (75)   | 307 (77.1) | 1                     | 0.69  | 406.4 |
|                                        |      | CT/TT | 18 (25)   | 91 (22.9)  | 1.12 (0.63 - 2.01)    |       |       |
|                                        | R    | CC/CT | 70 (97.2) | 397 (99.8) | 1                     | 0.044 | 402.5 |
|                                        |      | TT    | 2 (2.8)   | 1 (0.2)    | 11.34 (1.01 - 126.79) |       |       |
|                                        | O-D  | CC/TT | 56 (77.8) | 308 (77.4) | 1                     | 0.97  | 406.5 |
|                                        |      | CT    | 16 (22.2) | 90 (22.6)  | 0.98 (0.53 - 1.79)    |       |       |

Abbreviations: AIC, Akaike information criterion; Co-D, Co-dominant; D, Dominant; R, Recessive; O-D, Over-dominant; IL1B. interleukin 1 beta; IL12B. interleukin 12B; 3'UTR. 3'untranslated region; CCL2. chemokine (C-C motif) ligand 2; CCR5. chemokine (C-C motif) receptor 5 gene; wt - wild type; Δ32. 32-base pair deletion; NA. not applicable; TNF. tumour necrosis factor; TNFRSF1A. tumour necrosis factor receptor superfamily member 1A. IL10. interleukin 10; IL10RA. interleukin 10 receptor alpha.

<sup>a</sup> Significance levels were assessed using logistic regression model

<sup>b</sup> Percentage of genotyped samples was 469/470 (99.8%)

<sup>c</sup> Percentage of genotyped samples was 467/470 (99.4%)

**Table S2** Association analysis of individual SNPs with severity of congenital CMV disease (i.e. illness score)

| Gene<br>(SNP database ID number)        | Genotype | N  | Mean illness<br>score (SE) | Difference (95% CI)  | P-value <sup>a</sup> |
|-----------------------------------------|----------|----|----------------------------|----------------------|----------------------|
| <b>IL1B rs16944</b><br>(-511 T/C)       | CC       | 31 | 2.58 (0.35)                | 0                    | 0.15                 |
|                                         | CT       | 28 | 3.21 (0.44)                | 0.63 (-0.44 - 1.70)  |                      |
|                                         | TT       | 13 | 1.85 (3.5)                 | -0.73 (-2.09 - 0.62) |                      |
| <b>IL1B rs1143634</b><br>(+3954 T/C)    | CC       | 43 | 2.44 (0.29)                | 0                    | 0.41                 |
|                                         | CT       | 24 | 3.17 (0.48)                | 0.72 (-0.34 - 1.79)  |                      |
|                                         | TT       | 5  | 2.6 (1.21)                 | 0.16 (-1.81 - 2.21)  |                      |
| <b>IL12B rs3212227</b><br>(3'UTR C/A)   | AA       | 49 | 2.69 (0.31)                | 0                    | 0.12                 |
|                                         | AC       | 22 | 2.5 (0.39)                 | -0.19 (-1.24 - 0.85) |                      |
|                                         | CC       | 1  | 7 (0)                      | 4.31 (0.18 - 8.43)   |                      |
| <b>CCL2 rs13900</b><br>(+1543 T/C)      | CC       | 35 | 2.29 (0.34)                | 0                    | 0.27                 |
|                                         | CT       | 30 | 3.13 (0.37)                | 0.85 (-0.18 - 1.88)  |                      |
|                                         | TT       | 7  | 2.86 (1.12)                | 0.57 (-1.14 - 2.28)  |                      |
| <b>CCL2 rs1024611</b><br>(-2518 G/A)    | AA       | 36 | 2.36 (0.34)                | 0                    | 0.41                 |
|                                         | AG       | 29 | 3.07 (0.37)                | 0.71 (-0.33 - 1.75)  |                      |
|                                         | GG       | 7  | 2.86 (1.12)                | 0.50 (-1.22 - 2.21)  |                      |
| <b>CCR5 rs333</b><br>(CCR5Δ32)          | wt wt    | 58 | 2.64 (0.28)                | 0                    | 0.65                 |
|                                         | wtΔ32    | 14 | 2.93 (0.55)                | 0.29 (-0.95 - 1.54)  |                      |
| <b>TNF rs1799964</b><br>(-1031 C/T)     | TT       | 42 | 2.69 (0.3)                 | 0                    | 0.44                 |
|                                         | TC       | 29 | 2.79 (0.44)                | 0.10 (-0.90 - 1.11)  |                      |
|                                         | CC       | 1  | 0 (0)                      | -2.69 (-6.91 - 1.52) |                      |
| <b>TNF rs1800629</b><br>(-308 A/G)      | GG       | 52 | 2.52 (0.29)                | 0                    | 0.14                 |
|                                         | GA       | 17 | 2.82 (0.51)                | 0.30 (-0.84 - 1.45)  |                      |
|                                         | AA       | 3  | 5 (1)                      | 2.48 (0.05 - 4.91)   |                      |
| <b>TNFRSF1A rs4149570</b><br>(-201 A/C) | CC       | 29 | 3 (0.42)                   | 0                    | 0.61                 |
|                                         | CA       | 35 | 2.49 (0.32)                | -0.51 (-1.57 - 0.54) |                      |
|                                         | AA       | 8  | 2.5 (0.94)                 | -0.50 (-2.17 - 1.17) |                      |
| <b>IL10 rs1800896</b>                   | TT       | 23 | 3.3 (0.44)                 | 0                    | 0.25                 |

|                         |    |    |             |                      |      |
|-------------------------|----|----|-------------|----------------------|------|
| (-1082 G/A)             | CT | 42 | 2.43 (0.33) | -0.88 (-1.95 - 0.20) |      |
|                         | CC | 7  | 2.29 (0.75) | -1.02 (-2.80 - 0.76) |      |
| <b>IL10RA rs4252279</b> | CC | 54 | 2.74 (0.29) | 0                    | 0.19 |
| (+5964 T/C)             | CT | 16 | 2.88 (0.52) | 0.13 (-1.04 - 1.31)  |      |
|                         | TT | 2  | 0 (0)       | -2.74 (-5.70 - 0.22) |      |

<sup>a</sup> P-value calculated for linear regression.

**Table S3** Association analysis of individual SNPs with congenital CMV-related sensorineural hearing loss (SNHL) at birth

| Gene<br>(SNP database ID<br>number)       | Genetic<br>model | Genotype  | Genotype frequencies; n (%) |                               | OR (95% CI)        | P-value <sup>a</sup> | AIC  |
|-------------------------------------------|------------------|-----------|-----------------------------|-------------------------------|--------------------|----------------------|------|
|                                           |                  |           | SNHL<br>(n = 22)            | Normal<br>hearing<br>(n = 34) |                    |                      |      |
| <b>IL1B rs16944</b><br><br>(-511 T/C)     | Co-D             | CC        | 9 (40.9)                    | 14 (41.2)                     | 1                  | 0.94                 | 80.9 |
|                                           |                  | CT        | 9 (40.9)                    | 15 (44.1)                     | 0.93 (0.29 - 3.03) |                      |      |
|                                           |                  | TT        | 4 (18.2)                    | 5 (14.7)                      | 1.24 (0.26 - 5.92) |                      |      |
|                                           | D                | CC        | 9 (40.9)                    | 14 (41.2)                     | 1                  | 0.98                 | 79   |
|                                           |                  | CT/TT     | 13 (59.1)                   | 20 (58.8)                     | 1.01 (0.34 - 3.01) |                      |      |
|                                           | R                | CC/CT     | 18 (81.8)                   | 29 (85.3)                     | 1                  | 0.73                 | 78.9 |
|                                           |                  | TT        | 4 (18.2)                    | 5 (14.7)                      | 1.29 (0.31 - 5.44) |                      |      |
|                                           | O-D              | CC/TT     | 13 (59.1)                   | 19 (55.9)                     | 1                  | 0.81                 | 79   |
| CT                                        |                  | 9 (40.9)  | 15 (44.1)                   | 0.88 (0.30 - 2.60)            |                    |                      |      |
| <b>IL1B rs1143634</b><br><br>(+3954 T/C)  | Co-D             | CC        | 12 (54.5)                   | 23 (67.7)                     | 1                  | 0.15                 | 77.3 |
|                                           |                  | CT        | 10 (45.5)                   | 9 (26.5)                      | 2.13 (0.68 - 6.65) |                      |      |
|                                           |                  | TT        | 0 (0)                       | 2 (5.9)                       | 0 (0.00 - NA)      |                      |      |
|                                           | D                | CC        | 12 (54.5)                   | 23 (67.7)                     | 1                  | 0.32                 | 78.1 |
|                                           |                  | CT/TT     | 10 (45.5)                   | 11 (32.4)                     | 1.74 (0.58 - 5.26) |                      |      |
|                                           | R                | CC/CT     | 22 (100)                    | 32 (94.1)                     | 1                  | 0.15                 | 77   |
|                                           |                  | TT        | 0 (0)                       | 2 (5.9)                       | 0 (0.00 - NA)      |                      |      |
|                                           | O-D              | CC/TT     | 12 (54.5)                   | 25 (73.5)                     | 1                  | 0.14                 | 76.9 |
| CT                                        |                  | 10 (45.5) | 9 (26.5)                    | 2.31 (0.75 - 7.19)            |                    |                      |      |
| <b>IL12B rs3212227</b><br><br>(3'UTR C/A) | Co-D             | AA        | 14 (63.6)                   | 23 (67.7)                     | 1                  | 0.54                 | 79.8 |
|                                           |                  | AC        | 8 (36.4)                    | 10 (29.4)                     | 1.31 (0.42 - 4.12) |                      |      |
|                                           |                  | CC        | 0 (0)                       | 1 (2.9)                       | 0 (0.00 - NA)      |                      |      |
|                                           | D                | AA        | 14 (63.6)                   | 23 (67.7)                     | 1                  | 0.76                 | 78.9 |
|                                           |                  | AC/CC     | 8 (36.4)                    | 11 (32.4)                     | 1.19 (0.39 - 3.69) |                      |      |
|                                           | R                | AA/AC     | 22 (100)                    | 33 (97.1)                     | 1                  | 0.32                 | 78   |
| CC                                        |                  | 0 (0)     | 1 (2.9)                     | 0 (0.00 - NA)                 |                    |                      |      |



|                                      |      |       |           |           |                     |              |      |
|--------------------------------------|------|-------|-----------|-----------|---------------------|--------------|------|
|                                      | O-D  | AA/CC | 14 (63.6) | 24 (70.6) | 1                   | 0.59         | 78.7 |
|                                      |      | AC    | 8 (36.4)  | 10 (29.4) | 1.37 (0.44 - 4.29)  |              |      |
| <b>CCL2 rs13900</b><br>(+1543 T/C)   | Co-D | CC    | 6 (27.3)  | 19 (55.9) | 1                   | 0.1          | 76.5 |
|                                      |      | CT    | 13 (59.1) | 12 (35.3) | 3.43 (1.03 - 11.48) |              |      |
|                                      |      | TT    | 3 (13.6)  | 3 (8.8)   | 3.17 (0.50 - 20.04) |              |      |
|                                      | D    | CC    | 6 (27.3)  | 19 (55.9) | 1                   | <b>0.033</b> | 74.5 |
|                                      |      | CT/TT | 16 (72.7) | 15 (44.1) | 3.38 (1.06 - 10.74) |              |      |
|                                      | R    | CC/CT | 19 (86.4) | 31 (91.2) | 1                   | 0.57         | 78.7 |
|                                      |      | TT    | 3 (13.6)  | 3 (8.8)   | 1.63 (0.30 - 8.92)  |              |      |
|                                      | O-D  | CC/TT | 9 (40.9)  | 22 (64.7) | 1                   | 0.08         | 76   |
|                                      |      | CT    | 13 (59.1) | 12 (35.3) | 2.65 (0.88 - 7.98)  |              |      |
| <b>CCL2 rs1024611</b><br>(-2518 G/A) | Co-D | AA    | 7 (31.8)  | 20 (58.8) | 1                   | 0.14         | 77.1 |
|                                      |      | AG    | 12 (54.5) | 11 (32.4) | 3.12 (0.95 - 10.22) |              |      |
|                                      |      | GG    | 3 (13.6)  | 3 (8.8)   | 2.86 (0.46 - 17.58) |              |      |
|                                      | D    | AA    | 7 (31.8)  | 20 (58.8) | 1                   | 0.046        | 75.1 |
|                                      |      | AG/GG | 15 (68.2) | 14 (41.2) | 3.06 (0.99 - 9.45)  |              |      |
|                                      | R    | AA/AG | 19 (86.4) | 31 (91.2) | 1                   | 0.57         | 78.7 |
|                                      |      | GG    | 3 (13.6)  | 3 (8.8)   | 1.63 (0.30 - 8.92)  |              |      |
|                                      | O-D  | AA/GG | 23 (67.7) | 10 (45.5) | 1                   | 0.099        | 76.3 |
|                                      |      | AG    | 11 (32.4) | 12 (54.5) | 2.51 (0.83 - 7.57)  |              |      |
| <b>CCR5 rs333</b><br>(CCR5Δ32)       | NA   | wt wt | 17 (77.3) | 28 (82.3) | 1                   | 0.64         | 78.8 |
|                                      |      | wtΔ32 | 5 (22.7)  | 6 (17.6)  | 1.37 (0.36 - 5.20)  |              |      |
| <b>TNF rs179964</b><br>(-1031 C/T)   | Co-D | TT    | 12 (54.5) | 19 (55.9) | 1                   | 0.59         | 80   |
|                                      |      | TC    | 10 (45.5) | 14 (41.2) | 1.13 (0.38 - 3.35)  |              |      |
|                                      |      | CC    | 0 (0)     | 1 (2.9)   | 0 (0.00 - NA)       |              |      |
|                                      | D    | TT    | 12 (54.4) | 19 (55.9) | 1                   | 0.92         | 79   |
|                                      |      | TC/CC | 10 (45.5) | 15 (44.1) | 1.06 (0.36 - 3.10)  |              |      |
|                                      | R    | TT/TC | 22 (100)  | 33 (97.1) | 1                   | 0.32         | 78   |
|                                      |      | CC    | 0 (0)     | 1 (2.9)   | 0 (0.00 - NA)       |              |      |
|                                      | O-D  | TT/CC | 12 (54.4) | 20 (58.8) | 1                   | 0.75         | 78.9 |

|                                         |      |          |           |                    |                     |      |      |
|-----------------------------------------|------|----------|-----------|--------------------|---------------------|------|------|
|                                         |      | TC       | 10 (45.5) | 14 (41.2)          | 1.19 (0.40 - 3.51)  |      |      |
| <b>TNF rs1800629</b><br>(-308 A/G)      | Co-D | GG       | 16 (72.7) | 26 (76.5)          | 1                   | 0.93 | 80.9 |
|                                         |      | GA       | 5 (22.7)  | 7 (20.6)           | 1.16 (0.31 - 4.28)  |      |      |
|                                         |      | AA       | 1 (4.5)   | 1 (2.9)            | 1.62 (0.09 - 27.84) |      |      |
|                                         | D    | GG       | 16 (72.7) | 26 (76.5)          | 1                   | 0.75 | 78.9 |
|                                         |      | GA/AA    | 6 (27.3)  | 8 (23.5)           | 1.22 (0.36 - 4.16)  |      |      |
|                                         | R    | GG/GA    | 21 (95.5) | 33 (97.1)          | 1                   | 0.75 | 78.9 |
|                                         |      | AA       | 1 (4.5)   | 1 (2.9)            | 1.57 (0.09 - 26.50) |      |      |
|                                         | O-D  | GG/AA    | 17 (77.3) | 27 (79.4)          | 1                   | 0.85 | 79   |
| GA                                      |      | 5 (22.7) | 7 (20.6)  | 1.13 (0.31 - 4.16) |                     |      |      |
| <b>TNFRSF1A rs4149570</b><br>(-201 A/C) | Co-D | CC       | 11 (50)   | 12 (35.3)          | 1                   | 0.53 | 79.8 |
|                                         |      | CA       | 9 (40.9)  | 17 (50)            | 0.58 (0.18 - 1.82)  |      |      |
|                                         |      | AA       | 2 (9.1)   | 5 (14.7)           | 0.44 (0.07 - 2.73)  |      |      |
|                                         | D    | CC       | 11 (50)   | 12 (35.3)          | 1                   | 0.28 | 77.9 |
|                                         |      | CA/CC    | 11 (50)   | 22 (64.7)          | 0.55 (0.18 - 1.63)  |      |      |
|                                         | R    | CC/CA    | 20 (90.9) | 29 (85.3)          | 1                   | 0.53 | 78.6 |
|                                         |      | AA       | 2 (9.1)   | 5 (14.7)           | 0.58 (0.10 - 3.29)  |      |      |
|                                         | O-D  | CC/AA    | 13 (59.1) | 17 (50)            | 1                   | 0.5  | 78.6 |
| CA                                      |      | 9 (40.9) | 17 (50)   | 0.69 (0.23 - 2.05) |                     |      |      |
| <b>IL10 rs1800896</b><br>(-1082 G/A)    | Co-D | TT       | 9 (40.9)  | 13 (38.2)          | 1                   | 0.57 | 79.9 |
|                                         |      | CT       | 11 (50)   | 20 (58.8)          | 0.79 (0.26 - 2.44)  |      |      |
|                                         |      | CC       | 2 (9.1)   | 1 (2.9)            | 2.89 (0.23 - 36.87) |      |      |
|                                         | D    | TT       | 9 (40.9)  | 13 (38.2)          | 1                   | 0.84 | 79   |
|                                         |      | CT/CC    | 13 (59.1) | 21 (61.8)          | 0.89 (0.30 - 2.68)  |      |      |
|                                         | R    | TT/CT    | 20 (90.9) | 33 (97.1)          | 1                   | 0.32 | 78.1 |
|                                         |      | CC       | 2 (9.1)   | 1 (2.9)            | 3.30 (0.28 - 38.78) |      |      |
|                                         | O-D  | TT/CC    | 11 (50)   | 14 (41.2)          | 1                   | 0.52 | 78.6 |
| CT                                      |      | 11 (50)  | 20 (58.8) | 0.70 (0.24 - 2.06) |                     |      |      |
| <b>IL10RA rs4252279</b><br>(+5964 T/C)  | Co-D | CC       | 17 (77.3) | 23 (67.7)          | 1                   | 0.33 | 78.8 |
|                                         |      | CT       | 5 (22.7)  | 9 (26.5)           | 0.75 (0.21 - 2.65)  |      |      |

|     |       |           |           |                    |      |      |
|-----|-------|-----------|-----------|--------------------|------|------|
|     | TT    | 0 (0)     | 2 (5.9)   | 0 (0.00 - NA)      |      |      |
| D   | CC    | 17 (77.3) | 23 (67.7) | 1                  | 0.43 | 78.4 |
|     | CT/TT | 5 (22.7)  | 11 (32.4) | 0.61 (0.18 - 2.10) |      |      |
| R   | CC/CT | 22 (100)  | 32 (94.1) | 1                  | 0.15 | 77   |
|     | TT    | 0 (0)     | 2 (5.9)   | 0 (0.00 - NA)      |      |      |
| O-D | CC/TT | 17 (77.3) | 25 (73.5) | 1                  | 0.75 | 78.9 |
|     | CT    | 5 (22.7)  | 9 (26.5)  | 0.82 (0.23 - 2.87) |      |      |

<sup>a</sup> Significance levels were assessed using logistic regression model
